# Supplementary material for: Expression Patterns of the Drosophila Neuropeptide CCHamide-2 and Its Receptor May Suggest Hormonal Signaling from the Gut to the Brain
Source: PubMed Central journal article supplement (PMC3788761; doi:10.1371/journal.pone.0076131), 2013-10-02
Supplement: pone.0076131.s001.pdf [file pone.0076131.s001.pdf]

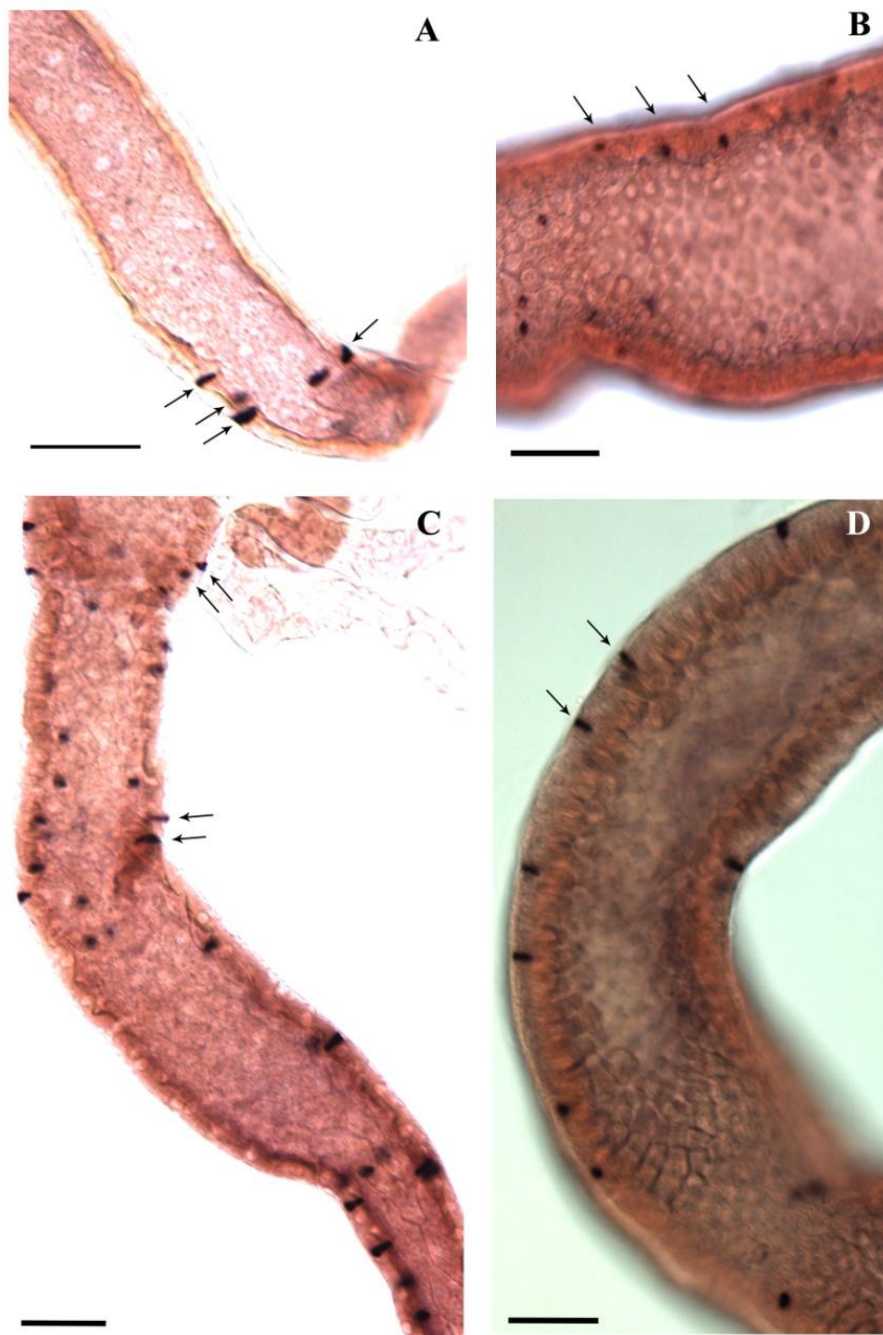

**Fig. S1.** *In situ* hybridizations, showing expression of the CCHamide-1 and -2 genes in endocrine cells of the larval and adult midgut of *D. melanogaster*. See Fig. 3 for a schematic presentation of the distribution of CCHamide-1 and -2 immunoreactive endocrine cells in the midgut. (A) CCHamide-1 cells (the arrows show some examples) in the posterior part of the larval anterior midgut. This region corresponds to the region highlighted in red in Fig. 3A. Scale bar = 100  $\mu\text{m}$ . (B) CCHamide-1 cells (the arrows show some examples) in the adult anterior midgut. Scale bar = 100  $\mu\text{m}$ . (C) CCHamide-2 cells (the arrows show some examples) in the larval anterior midgut. Scale bar = 100  $\mu\text{m}$ . (D) CCHamide-2 cells (the arrows show some examples) in the adult anterior midgut. Scale bar = 100  $\mu\text{m}$ .
