# Supplementary material for: Expression Patterns of the Drosophila Neuropeptide CCHamide-2 and Its Receptor May Suggest Hormonal Signaling from the Gut to the Brain
Source: PubMed Central journal article supplement (PMC3788761; doi:10.1371/journal.pone.0076131), 2013-10-02
Supplement: pone.0076131.s004.pdf [file pone.0076131.s004.pdf]

**Table S2.** Primers used for *in situ* hybridization

| Gene or vector | Forward primer       | Reverse primer       | Accession number | Position of amplicon |
|----------------|----------------------|----------------------|------------------|----------------------|
| CCHamide-1     | AGGCGGCATAGATGCTAA   | TGCAATGATCTCGCGTGT   | NM_001104314     | 301-839              |
| CCHamide-2     | AGGAACCGGACTATGTGC   | CGCTGTCTTTGCCGTTTT   | NM_142028        | 332-895              |
| T3             | ATTAACCCTCACTAAAGGGA |                      |                  |                      |
| T7             |                      | TAATACGACTCACTATAGGG |                  |                      |
